# Supplementary material for: Contrasting patterns of change in snowline altitude across five Himalayan catchments
Source: Copernicus journal article supplement (doi:10.5194/egusphere-2024-2026), 2024-08-07
Supplement: Supplementary file 1 [file egusphere-2024-2026-supplement.pdf]

1 **Supplementary information**

2

3 **Contrasting patterns of change in snow line altitude across five Himalayan**  
4 **catchments**

5 Orié Sasaki<sup>1</sup>, Evan S. Miles<sup>2</sup>, Francesca Pellicciotti<sup>2</sup>, Akiko Sakai<sup>1</sup>, Koji Fujita<sup>1</sup>

6 <sup>1</sup>Graduate School of Environmental Studies, Nagoya University, Nagoya, 484–8601, Japan

7 <sup>2</sup>Swiss Federal Institute for Forest, Snow, and Landscape Research WSL, Birmensdorf, CH-8903, Switzerland

8

9 *Correspondence to:* Orié Sasaki (sasaki.o.ab@m.titech.ac.jp)

10

11 **Content:**

12 **1. Supplementary Figures**

- 13 • **Figure S1: Monthly total precipitation and mean air temperature for the five target regions**
- 14 • **Figure S2: Schematic diagram of the snowline detection algorithm**
- 15 • **Figure S3: Comparison of cumulative frequency of SLAs**
- 16 • **Figure S4: Comparison of detected SLA among three satellites**
- 17 • **Figure S5: Snowlines derived from automatic and manual detections.**
- 18 • **Figure S6: Comparison of detected SLAs from this study and standard detection method using**
- 19 **MODIS**

20

21 **2. Supplementary Tables**

- 22 • **Table S1: Results of the multiple regression analysis for the 60-month moving average**

23

24

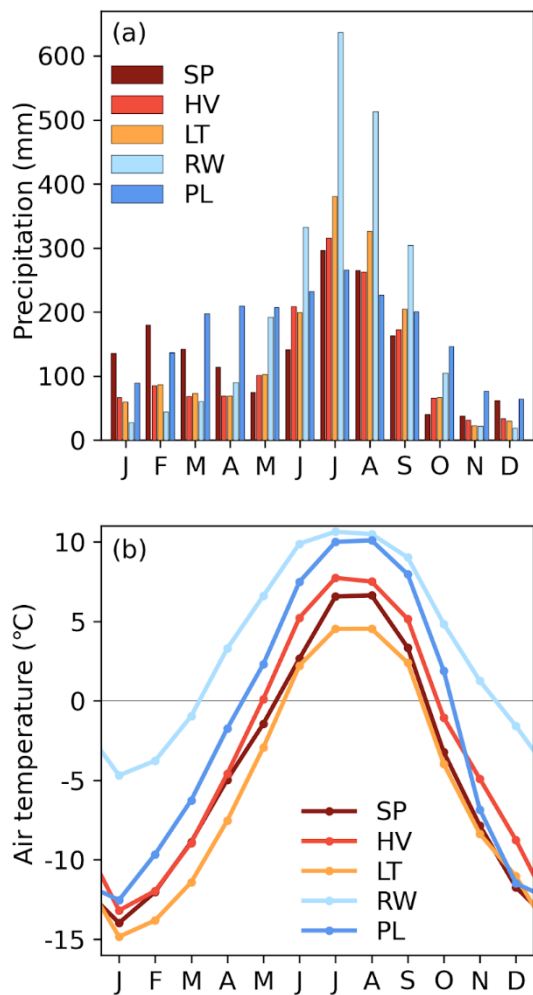

25

26 **Figure S1: (a) Monthly total precipitation and (b) mean air temperature obtained from the ERA5 reanalysis climate data (Hersbach**  
 27 **et al., 2020). The data were averaged for the period from 1999 to 2019 at the grid that includes most of the target catchment without**  
 28 **any corrections. Catchment abbreviations denote SP: Satopanth, HV: Hidden Valley, LT: Langtang Valley, RW: Rolwaling Valley,**  
 29 **and PL: Parlung, respectively.**

30

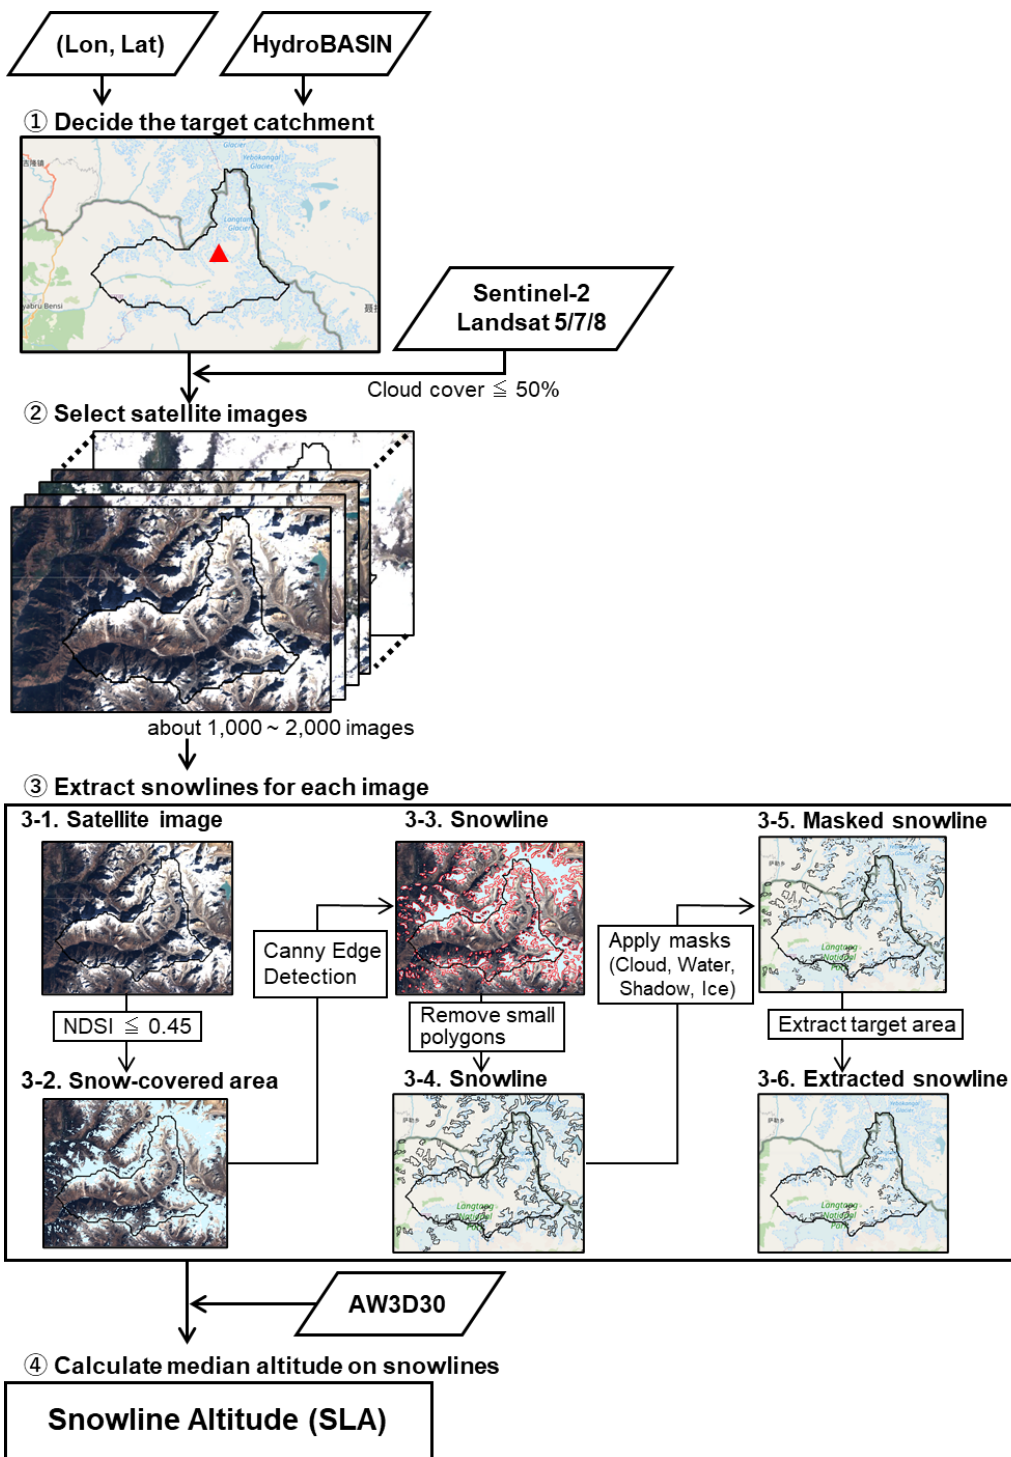

31

32 Figure S2: Schematic diagram of the snowline detection algorithm with a sample image obtained from Landsat 8

33

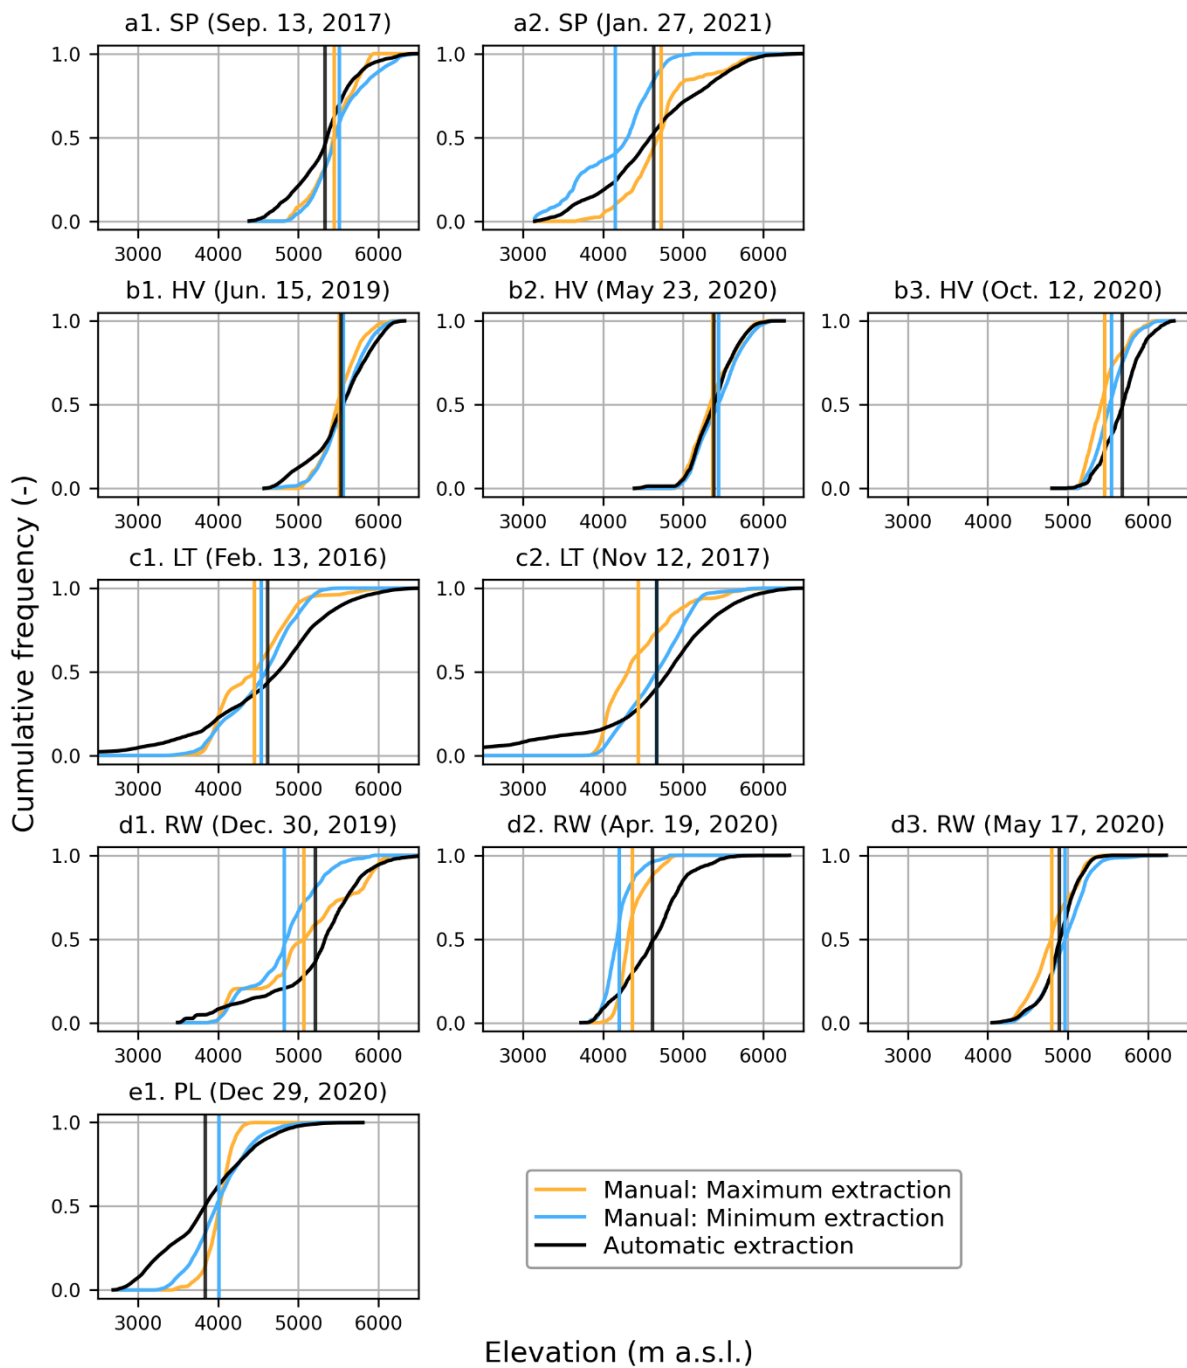

34

35 **Figure S3: Comparison of cumulative frequency of SLA between the automatically detected snowlines and the manually delineated**  
 36 **ones. a1-2, b1-3, c1-2, d1-4, and e1 show the comparison in Satopanth (SP), Hidden Valley (HV), Langtang (LT), Rolwaling (RW),**  
 37 **and Parlung (PL), respectively.**

38

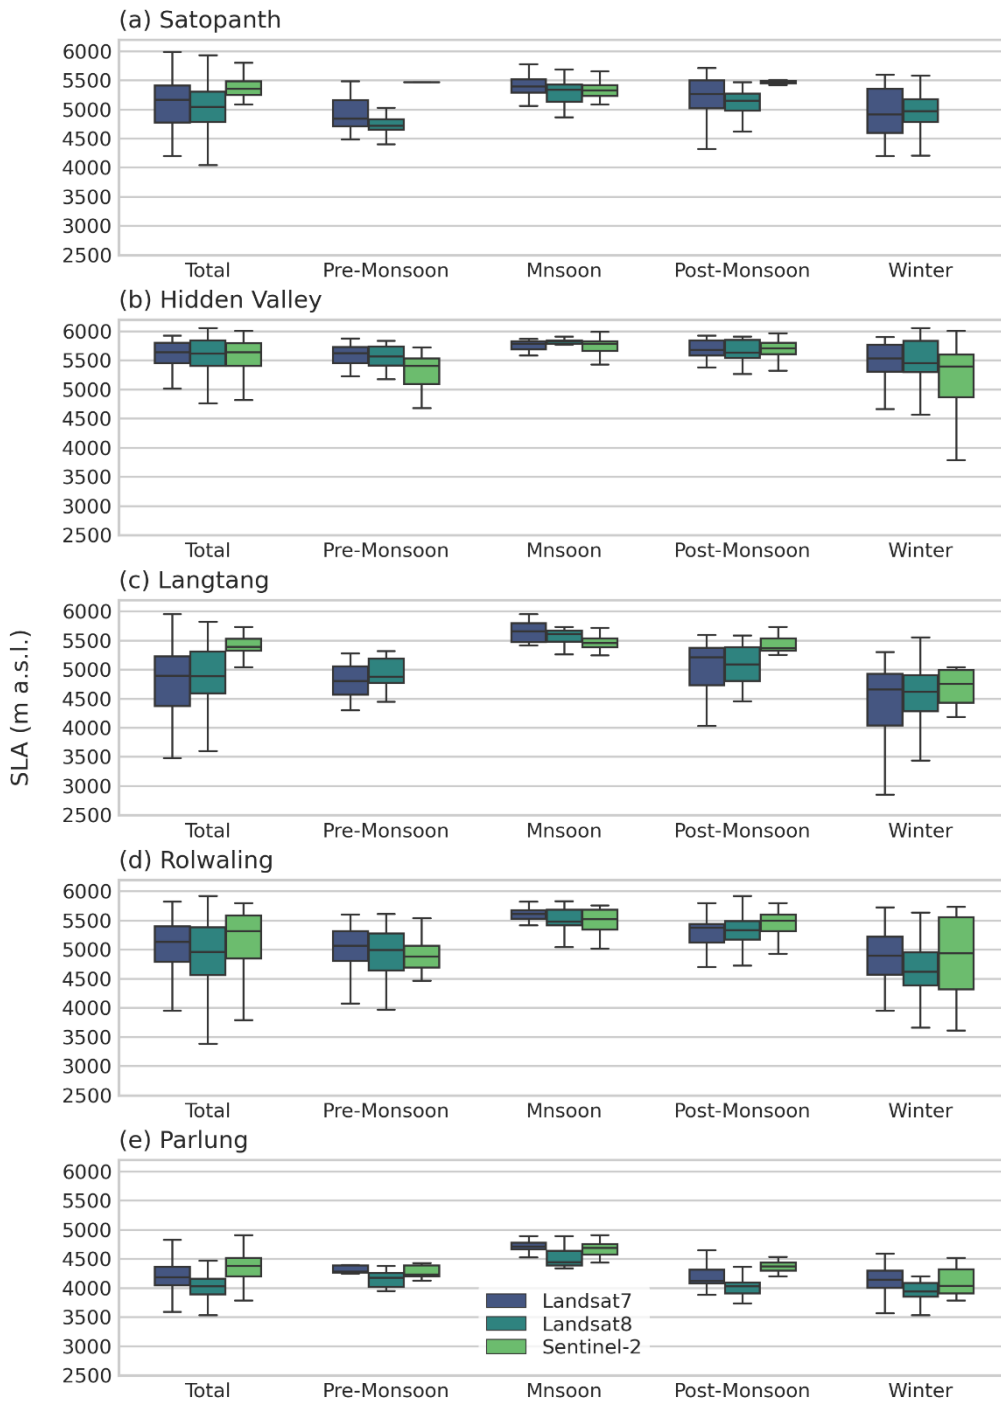

39

40 **Figure S4: Comparison of cumulative frequency of SLA between the automatically detected snowlines and the manually delineated**  
 41 **ones.**

42

**(a) Automatic detection**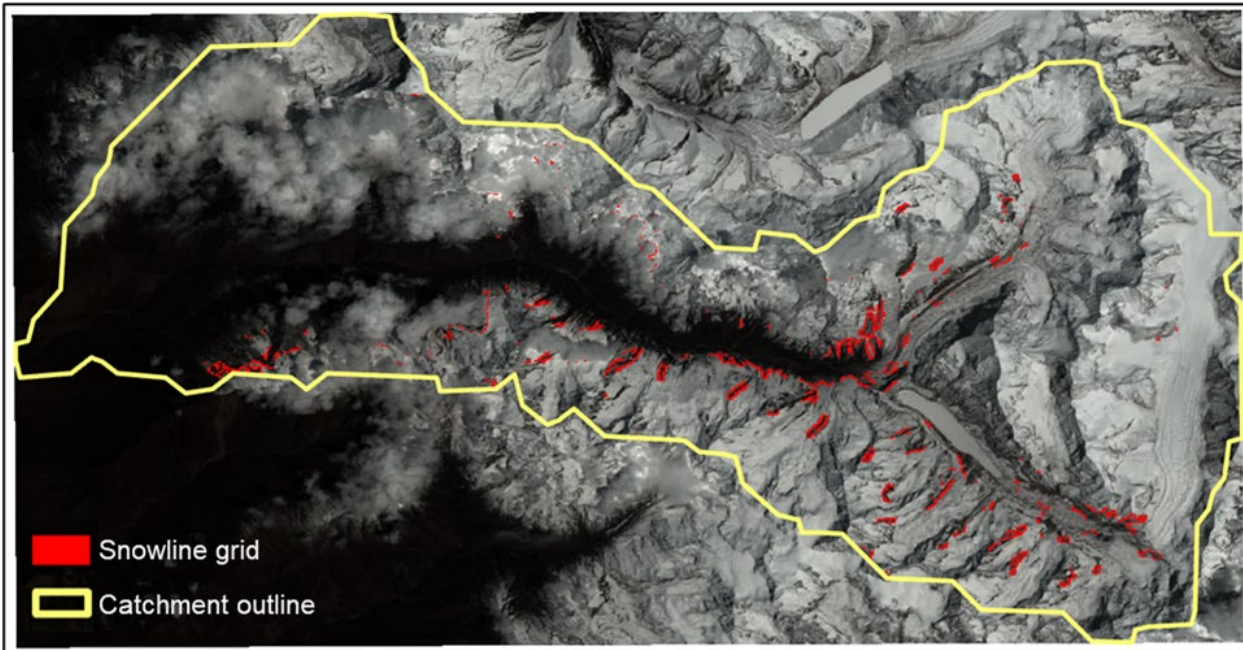**(b) Manual detection**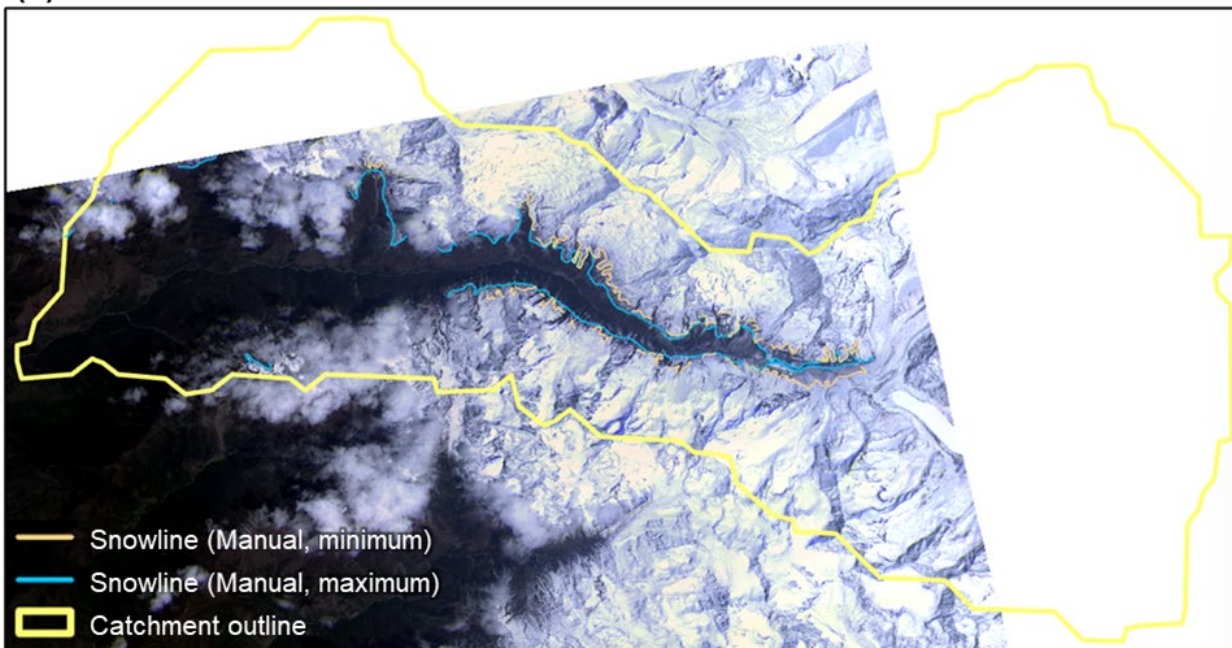

44

45 **Figure S5: Snowlines derived from (a) automatic detection and (b) manual detection. The background images are the**  
 46 **satellite images used for snowline detection: (a) Landsat 8 on April 20, 2020, and (b) PlanetScope on April 19, 2019.**

47

48

49

50

51

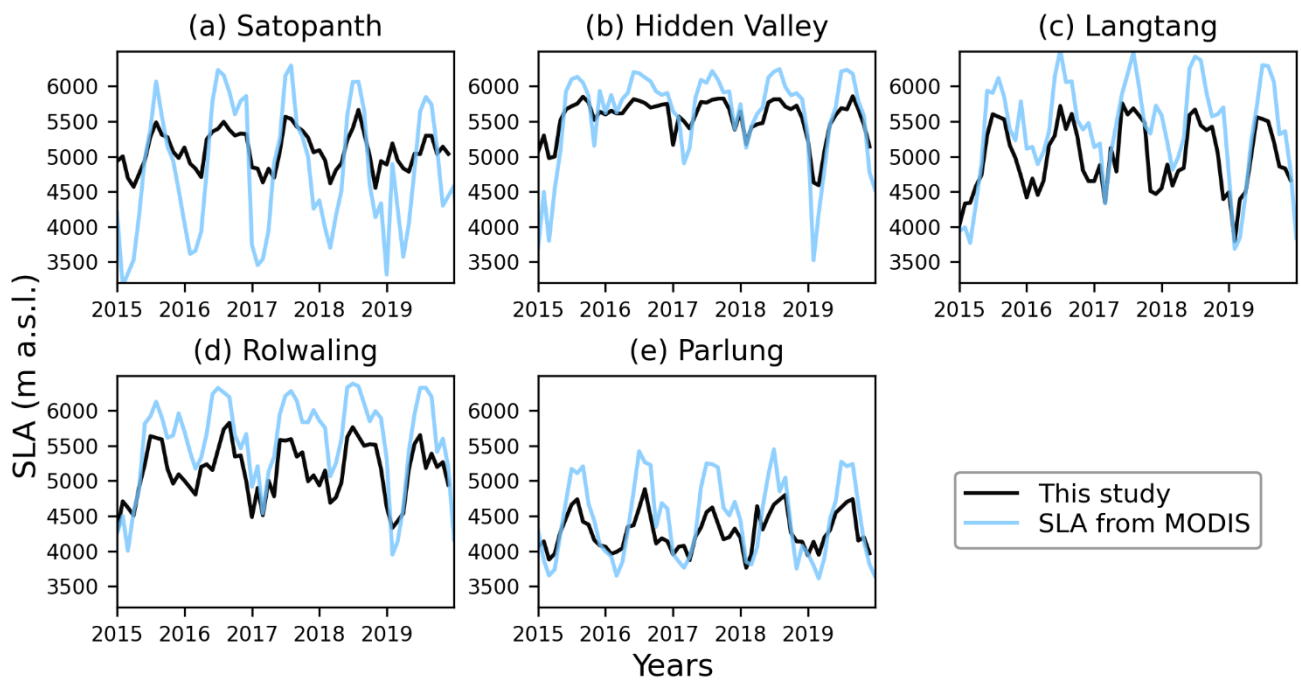

52

53

**Figure S6: Comparison of detected SLAs from this study and standard detection method using MODIS.**

54

55

57 **Table S1: Results of the multiple regression analysis using 60-month moving averages of climate data and SLA. Influential factors**  
 58 **(p-value < 0.05 and |t-value| > 2.0) are shown in bold. A positive or negative t-value indicates a contribution to the increase or**  
 59 **decrease of SLA, respectively.**

|                      |                 | <b>Coefficient</b> | <b>Standard error</b> | <b>t-value</b> | <b>p-value</b>   |
|----------------------|-----------------|--------------------|-----------------------|----------------|------------------|
| <b>Satopanth</b>     | Air temperature | <b>89.9</b>        | <b>10.38</b>          | <b>8.66</b>    | <b>&lt;0.001</b> |
|                      | Precipitation   | <b>-1.39</b>       | <b>0.47</b>           | <b>-2.96</b>   | <b>0.003</b>     |
|                      | Solar radiation | -2.48              | 1.54                  | -1.61          | 0.108            |
| <b>Hidden Valley</b> | Air temperature | <b>114.54</b>      | <b>20.39</b>          | <b>5.62</b>    | <b>&lt;0.001</b> |
|                      | Precipitation   | <b>8.19</b>        | <b>0.99</b>           | <b>8.29</b>    | <b>&lt;0.001</b> |
|                      | Solar radiation | <b>24.83</b>       | <b>5.42</b>           | <b>4.58</b>    | <b>&lt;0.001</b> |
| <b>Langtang</b>      | Air temperature | <b>123.29</b>      | <b>16.59</b>          | <b>7.43</b>    | <b>&lt;0.001</b> |
|                      | Precipitation   | <b>7.94</b>        | <b>0.85</b>           | <b>9.37</b>    | <b>&lt;0.001</b> |
|                      | Solar radiation | 2.90               | 4.92                  | 0.59           | 0.556            |
| <b>Rolwaling</b>     | Air temperature | <b>224.13</b>      | <b>6.34</b>           | <b>35.35</b>   | <b>&lt;0.001</b> |
|                      | Precipitation   | <b>7.72</b>        | <b>0.36</b>           | <b>21.59</b>   | <b>&lt;0.001</b> |
|                      | Solar radiation | <b>28.44</b>       | <b>1.31</b>           | <b>21.67</b>   | <b>&lt;0.001</b> |
| <b>Parlung</b>       | Air temperature | <b>33.23</b>       | <b>9.60</b>           | <b>3.46</b>    | <b>0.001</b>     |
|                      | Precipitation   | -0.03              | 0.27                  | -0.12          | 0.905            |
|                      | Solar radiation | 1.34               | 0.84                  | 1.29           | 0.114            |
